# Supplementary material for: Supercharged natural killer (NK) cells inhibit melanoma tumor progression and restore endogenous NK cell function in humanized BLT mice
Source: Research Square preprint supplement (doi:10.21203/rs.3.rs-6792338/v1), 2025-06-09
Supplement: Supplementary file 1 [file cf32c48150f1ccc92bd964a1.docx]

**Supplementary Data**

**Figure S1**: **Infusion of sNK cells restored IFN-γ secretion and NK cell-mediated cytotoxic function in the peripheral blood of melanoma tumor-bearing hu-BLT mice**

Hu-BLT were implanted with melanoma tumors and injected with NK cells as described in the main file, Figure 1. Following sacrifice, peripheral blood was collected, single cell suspensions were prepared, and were treated with IL-2 (1000 U/ml) and cultured for 7 days, after which the supernatants were harvested and the levels of IFN-γ were determined using specific ELISAs (n=3) **(A)**. Peripheral blood-derived single cell suspensions were treated with IL-2 (1000 U/ml) and were cultured for 7 days, and cytotoxicity assays were performed using a standard 4-hour 51Cr release assay against OSCSCs, and the LU 30/106 cells were determined using an inverse number of cells required to lyse 30% of OSCSCs x100 (n=2) **(B)**.

**Figure S2. Infusion of sNK cells restored IFN-γ secretion in the spleen-derived T cells of melanoma tumor-bearing hu-BLT mice**

Hu-BLT were implanted with melanoma tumors and injected with NK cells as described in main file, Figure 1. Following sacrifice, the spleen was collected, single cell suspensions were prepared, and T cells were purified. Spleen-derived T cells were treated with IL-2 (100 U/ml) and were cultured for 7 days, after which the supernatants were harvested and the levels of IFN-γ were determined using specific ELISAs (n=3).

**Figure S1 PBMCs**

**
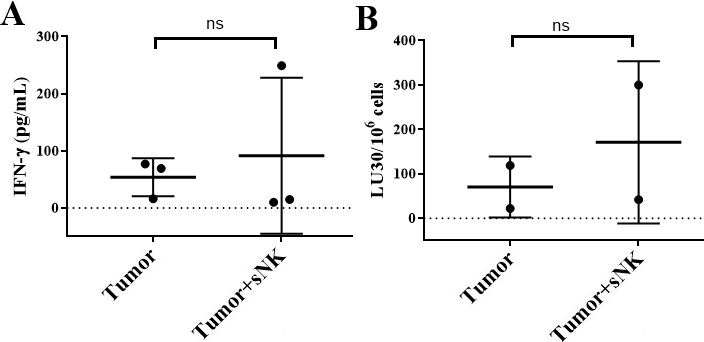
**

**Figure S2 T cells**

**
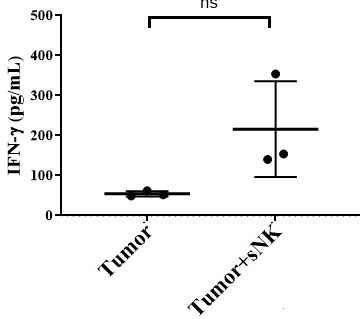
**
